# Supplementary material for: Wheat CBL-interacting protein kinase 23 positively regulates drought stress and ABA responses
Source: PubMed Central journal article supplement (PMC5970481; doi:10.1186/s12870-018-1306-5), 2018-05-25
Supplement: 12870_2018_1306_MOESM1_ESM.pdf [file 12870_2018_1306_MOESM1_ESM.pdf]

# Wheat CBL-interacting protein kinase 23 positively regulates plant drought stress and ABA responses

Xiao-Yu Cui <sup>1 †</sup>, Yong-Tao Du <sup>1 †</sup>, Jin-Dong Fu <sup>1</sup>, Tai-Fei Yu <sup>1</sup>, Chang-Tao Wang <sup>2</sup>, Ming Chen <sup>1</sup>, Jun Chen <sup>1</sup>, You-Zhi Ma <sup>1 \*</sup>, Zhao-Shi Xu <sup>1 \*</sup>

Figure S1

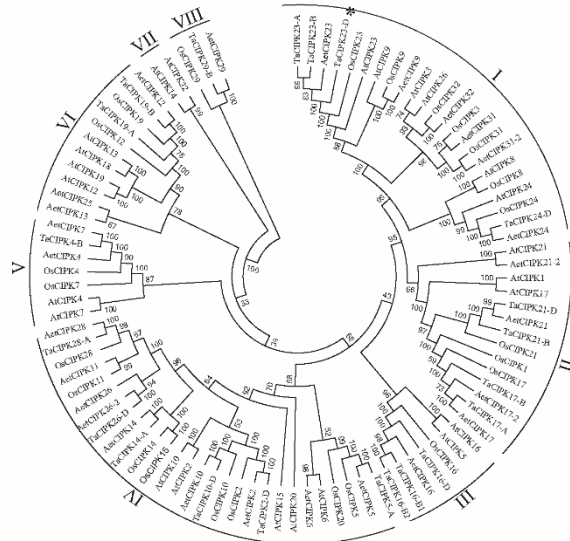

FigureS2

Figure S2

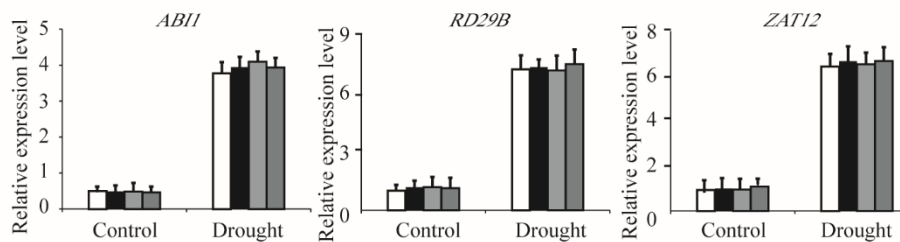

Table S1

| Gene                     | Forward Primer           | Reverse Primer           |
|--------------------------|--------------------------|--------------------------|
| <i>P5CS</i>              | GAAGGACTTACAACGAGATGGA   | CTCTCCTCAAGTCTCAACCAATAC |
| <i>NCED3</i>             | CAGCTTGTAGCTTTTGGGCTGTA  | TAACAGAAACCAGCTGAGCTCGA  |
| <i>RAB18</i>             | GCAACTCCACAAGGAAAGTGGT   | TGATGACCTGGCAACTTCTCC    |
| <i>RD29A</i>             | GGCGTAACAGGTAAACCTAGAG   | TCCGATGTAAACGTCGTCC      |
| <i>DREB1A</i>            | TCTCTGAACCAGAGTCGTTT     | CTTCTTCTACCGTCTTTCAC     |
| <i>COR47</i>             | GGAGTACAAGAACAACGTTCCCGA | TGTCGTCGCTGGTGATTCTCT    |
| <i>KIN1</i>              | AACAAGAATGCCTTCCAAGC     | CGCATCCGATACACTCTTTCC    |
| <i>ZAT12</i>             | GTCACAAGAAGCCTAACAACGA   | ACTCAGATCCAACAAGCCAC     |
| <i>RD22B</i>             | ATACCTTCCGACCAGATAGCGG   | TACCACCGAGCCAAGAAGTGAC   |
| <i>Arabidopsis actin</i> | AAGCAATGAGCATGAGCAAG     | GGAAGACACGACAGGAAACAC    |
| <i>TaCIPK23</i>          | ATGGCAGGCTACCTTCCGTT     | GATTGAGGCCCTGGGAGGTA     |
| <i>wheat actin</i>       | CTCCCTCACAACAACCGC       | TACCAGGAACTTCCATACCAAC   |
